# Supplementary material for: Mobile evaporite enhances the cycle of physical–chemical erosion in badlands
Source: Copernicus journal article supplement (doi:10.5194/esurf-11-475-2023), 2023-05-24
Supplement: Supplementary file 1 [file esurf-11-475-2023-supplement.pdf]

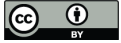

*Supplement of*

## **Mobile evaporite enhances the cycle of physical–chemical erosion in badlands**

**Ci-Jian Yang et al.**

*Correspondence to:* Ci-Jian Yang (d03228001@ntu.edu.tw)

The copyright of individual parts of the supplement might differ from the article licence.

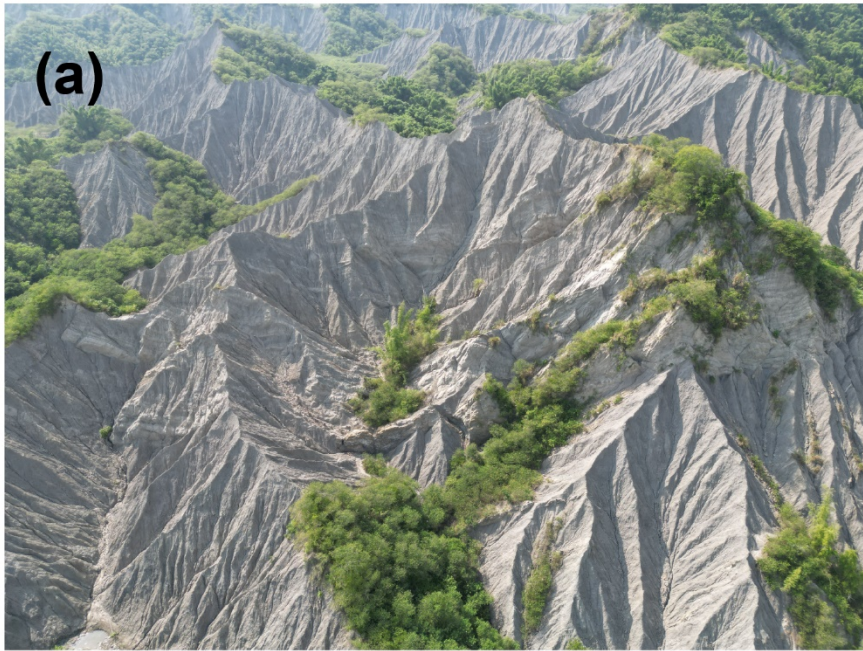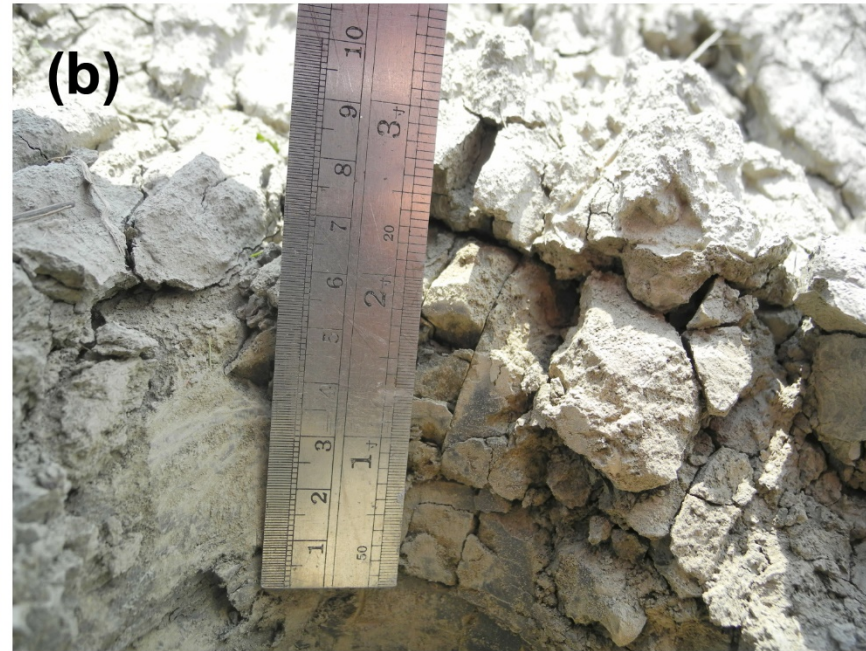

Fig. S1. (a) Aerial view of mudstone badlands landscape taken from Guting Bridge (GT) (Figure 1). Badlands cover an area of 4.37 km<sup>2</sup>, which accounts for 2.49% of the total catchment area. (b) the profile of a mudstone hillslope. Mud cracks extend down to the area approximately 10 cm below the mudstone surface.

**Table S1** The riverine chemistry and related hydrological characteristics of river in Nanxiong Bridge.

| duration | WT   | pH  | COND                | SSC                | Cl <sup>-</sup> | SO <sub>4</sub> <sup>2-</sup> | Na <sup>+</sup>      | Ca <sup>2+</sup> | Sr <sup>2+</sup> | SAR                 | D <sub>50</sub> | Q                              |
|----------|------|-----|---------------------|--------------------|-----------------|-------------------------------|----------------------|------------------|------------------|---------------------|-----------------|--------------------------------|
| h        | °C   |     | μs cm <sup>-1</sup> | mg L <sup>-1</sup> |                 |                               | μmol L <sup>-1</sup> |                  |                  | meq L <sup>-1</sup> | μm              | m <sup>3</sup> s <sup>-1</sup> |
| 0.0      | 29.1 | 7.3 | 340                 | 11                 | *               | 1008                          | 2270                 | 1530             | 5.06             | 1.44                | *               | *                              |
| 5.5      | 28.7 | 8.2 | 420                 | 11                 | 790             | 890                           | 1933                 | 1407             | 4.55             | 1.24                | *               | 2.3                            |
| 8.5      | 27.8 | 8.5 | 460                 | 95                 | 532             | 594                           | 1972                 | 1383             | 4.39             | 1.29                | *               | 2.7                            |
| 11.5     | 28.1 | 7.2 | 96                  | 29186              | 377             | 572                           | 2753                 | 990              | 3.24             | 2.12                | 4.4             | 34.0                           |
| 14.5     | 26.7 | 7.8 | 99                  | 33758              | 822             | 1107                          | 3387                 | 679              | 2.56             | 3.14                | 4.7             | 90.5                           |
| 17.5     | 26.9 | 7.5 | 99                  | 31407              | 871             | 1079                          | 2955                 | 613              | 2.14             | 2.86                | 6.4             | 115.7                          |
| 20.5     | 27.0 | 7.5 | 180                 | 12885              | 1265            | 1560                          | 2126                 | 837              | 2.42             | 1.80                | 4.1             | 120.3                          |
| 26.5     | 28.9 | 7.4 | 260                 | 7762               | 1461            | 1662                          | 1486                 | 774              | 2.31             | 1.32                | 4.2             | 79.3                           |
| 32.5     | 27.5 | 7.5 | 460                 | 6285               | 1161            | 1238                          | 1478                 | 785              | 2.35             | 1.30                | 3.9             | 20.6                           |
| 35.5     | 26.4 | 7.8 | 99                  | 5445               | 528             | 771                           | 420                  | 351              | 0.84             | 0.58                | 8.1             | 64.5                           |
| 38.5     | 25.7 | 7.7 | 99                  | 16900              | 448             | 682                           | 1348                 | 560              | 1.53             | 1.42                | 8.2             | 464.8                          |
| 41.5     | 25.5 | 7.4 | 99                  | 16247              | 165             | 215                           | 1072                 | 486              | 1.36             | 1.22                | 6.0             | 724.3                          |
| 44.5     | 25.2 | 7.3 | 99                  | 5201               | 348             | 392                           | 1132                 | 457              | 1.27             | 1.33                | 5.5             | 753.2                          |
| 47.5     | 26.3 | 7.3 | 99                  | 10184              | 280             | 350                           | 960                  | 519              | 1.37             | 1.07                | 6.1             | 667.3                          |
| 50.5     | 25.9 | 7.7 | 99                  | 11427              | 270             | 356                           | 1107                 | 544              | 1.44             | 1.19                | 6.1             | 560.2                          |
| 53.5     | 26.2 | 7.8 | 99                  | 7799               | 305             | 418                           | 1007                 | 599              | 1.61             | 1.03                | 5.6             | 379.8                          |
| 56.5     | 26.2 | 7.6 | 250                 | 6091               | 295             | 429                           | 1000                 | 719              | 1.92             | 0.94                | 6.6             | 214.7                          |
| 59.5     | 25.8 | 7.7 | 170                 | 7270               | 314             | 478                           | 1189                 | 816              | 2.31             | 1.04                | 4.6             | 124.6                          |
| 62.5     | 26.5 | 7.6 | 310                 | 7275               | 570             | 813                           | 1593                 | 949              | 2.59             | 1.29                | 4.6             | 86.9                           |
| 68.5     | 26.3 | 7.6 | 500                 | 10871              | 807             | 1216                          | 2216                 | 1178             | 3.31             | 1.58                | 6.4             | 101.7                          |
| 71.5     | 27.3 | 7.5 | 310                 | 10777              | 609             | 1009                          | 1899                 | 1036             | 2.93             | 1.44                | 5.6             | 126.1                          |

\* no data; (WT): water temperature; (COND): conductivity; (D<sub>50</sub>): median of particle sizes; (Q): discharge

**Table S2** The riverine chemistry and related hydrological characteristics of river in Guting Bridge.

| duration | WT   | pH  | COND                | SSC                | Cl <sup>-</sup> | SO <sub>4</sub> <sup>2-</sup> | Na <sup>+</sup>      | Ca <sup>2+</sup> | Sr <sup>2+</sup> | SAR                 | D <sub>50</sub> | P <sub>acc</sub>   |
|----------|------|-----|---------------------|--------------------|-----------------|-------------------------------|----------------------|------------------|------------------|---------------------|-----------------|--------------------|
| h        | °C   |     | μs cm <sup>-1</sup> | mg L <sup>-1</sup> |                 |                               | μmol L <sup>-1</sup> |                  |                  | meq L <sup>-1</sup> | μm              | mm h <sup>-1</sup> |
| 0.0      | 29.0 | 7.9 | 930                 | 164                | 330             | 655                           | 1163                 | 1135             | 3.03             | 0.86                | *               | 0.0                |
| 5.5      | 28.4 | 8.5 | 240                 | 17718              | 803             | 965                           | 2047                 | 1060             | 2.89             | 1.56                | 6.8             | 0.0                |
| 8.5      | 27.6 | 7.7 | 230                 | 19539              | 1425            | 1504                          | 3743                 | 896              | 2.99             | 3.05                | 5.6             | 55.5               |
| 11.5     | 27.6 | 7.4 | 98                  | 12172              | 1515            | 1162                          | 3666                 | 597              | 1.87             | 3.61                | 4.5             | 83.5               |
| 14.5     | 27.0 | 7.4 | 143                 | 11082              | 532             | 647                           | 1610                 | 734              | 1.93             | 1.47                | 5.5             | 89.5               |
| 17.5     | 26.6 | 7.4 | 99                  | 11257              | 575             | 645                           | 2112                 | 731              | 2.02             | 1.92                | 5.7             | 98.0               |
| 20.5     | 27.0 | 7.4 | 260                 | 6845               | 284             | 560                           | 1133                 | 778              | 2.11             | 1.01                | 5.8             | 100.0              |
| 26.5     | 28.7 | 7.3 | 140                 | 2857               | 248             | 491                           | 1037                 | 761              | 2.05             | 0.93                | 3.6             | 100.0              |
| 32.5     | 27.2 | 7.3 | 350                 | 3659               | 300             | 595                           | 1126                 | 905              | 2.43             | 0.93                | 3.6             | 101.5              |
| 35.5     | 26.6 | 7.8 | 99                  | 35921              | 1390            | 1004                          | 3515                 | 366              | 1.06             | 4.41                | 3.6             | 129.5              |
| 38.5     | 26.2 | 7.4 | 99                  | 15445              | 169             | 287                           | 847                  | 543              | 1.46             | 0.92                | 6.0             | 239.5              |
| 41.5     | 25.8 | 7.5 | 99                  | 12625              | 196             | 253                           | 865                  | 443              | 1.18             | 1.04                | 6.7             | 306.0              |
| 44.5     | 25.2 | 7.5 | 99                  | 14029              | 236             | 292                           | 985                  | 463              | 1.19             | 1.15                | 5.3             | 324.0              |
| 47.5     | 26.1 | 7.5 | 99                  | 9268               | 165             | 282                           | 806                  | 571              | 1.42             | 0.85                | 5.5             | 378.5              |
| 50.5     | 26.1 | 7.6 | 99                  | 5943               | 139             | 253                           | 666                  | 574              | 1.46             | 0.71                | 3.8             | 390.0              |
| 53.5     | 26.3 | 7.6 | 99                  | 4150               | 175             | 332                           | 710                  | 690              | 1.71             | 0.68                | 5.8             | 392.0              |
| 56.5     | 26.3 | 7.5 | 120                 | 7716               | 425             | 607                           | 1456                 | 782              | 2.13             | 1.29                | 8.8             | 402.5              |
| 59.5     | 26.4 | 7.6 | 140                 | 3430               | 289             | 551                           | 1090                 | 926              | 2.34             | 0.90                | 3.9             | 403.0              |
| 62.5     | 26.4 | 7.6 | 240                 | 4906               | 439             | 705                           | 1442                 | 983              | 2.57             | 1.14                | 4.9             | 406.5              |
| 68.5     | 26.4 | 7.6 | 120                 | 11861              | 367             | 589                           | 1614                 | 855              | 2.26             | 1.35                | 5.6             | 426.0              |
| 71.5     | 26.9 | 7.6 | 99                  | 4715               | 332             | 625                           | 1225                 | 925              | 2.39             | 1.00                | 5.5             | 428.0              |

\* no data; (WT): water temperature; (COND): conductivity; (D<sub>50</sub>): median of particle sizes; (P<sub>acc</sub>): precipitation accumulation.

**Table S3** Chemical weathering rate of Nanxiong Bridge.

|                            | Flux <sub>rain</sub>                | Flux <sub>evap</sub> | Flux <sub>sil</sub> | Flux <sub>carb</sub> |
|----------------------------|-------------------------------------|----------------------|---------------------|----------------------|
|                            | t km <sup>-2</sup> yr <sup>-1</sup> |                      |                     |                      |
| annual average (2014-2016) | 10.3                                | 96.9                 | 101.2               | 135.7                |
| typhoon period (2017)      | 2.9                                 | 10.9                 | 16.8                | 6.6                  |
| ratio (%)                  | 28.2                                | 11.2                 | 16.6                | 4.9                  |

**Table S4** Time series of Molar ratio for Na/(1000·Sr) and Ca/(1000·Sr) in Nanxiong Bridge during the non-typhoon period.

| date       | Nanxiong Bridge |              |
|------------|-----------------|--------------|
|            | Ca/(1000·Sr)    | Na/(1000·Sr) |
| 2014/9/19  | 0.244           | 0.211        |
| 2014/10/25 | 0.257           | 0.191        |
| 2014/11/22 | 0.178           | 0.095        |
| 2014/12/20 | 0.249           | 0.096        |
| 2015/1/17  | 0.270           | 0.219        |
| 2015/3/1   | 0.270           | 0.232        |
| 2015/3/21  | 0.282           | 0.232        |
| 2015/4/25  | 0.257           | 0.218        |
| 2015/5/23  | 0.250           | 0.254        |
| 2015/6/20  | 0.217           | 0.202        |
| 2015/6/26  | 0.202           | 0.113        |
| 2015/7/18  | 0.296           | 0.263        |
| 2015/8/15  | 0.297           | 0.349        |
| 2015/9/19  | 0.303           | 0.269        |
| 2015/10/17 | 0.294           | 0.190        |
| 2015/11/16 | 0.240           | 0.175        |
| 2015/12/26 | 0.261           | 0.201        |
| 2016/1/20  | 0.288           | 0.227        |
| 2016/1/23  | 0.285           | 0.218        |
| 2016/2/27  | 0.270           | 0.205        |
| 2016/3/19  | 0.298           | 0.183        |
| 2016/4/16  | 0.315           | 0.345        |
| 2016/5/14  | 0.285           | 0.443        |

---

|            |       |       |
|------------|-------|-------|
| 2016/6/22  | 0.272 | 0.266 |
| 2016/7/20  | 0.287 | 0.326 |
| 2016/8/11  | 0.265 | 0.375 |
| 2016/9/30  | 0.263 | 0.257 |
| 2016/10/25 | 0.339 | 0.216 |
| 2016/11/29 | 0.225 | 0.171 |
| 2016/12/21 | 0.253 | 0.283 |
| 2014/9/19  | 0.264 | 0.166 |

---

**Table S5** Time series of Molar ratio for Na/(1000·Sr) and Ca/(1000·Sr) in Nanxiong Bridge and Guting Bridge during the 2017 typhoon.

| duration | Nanxiong Bridge |              | Guting Bridge |              |
|----------|-----------------|--------------|---------------|--------------|
|          | Ca/(1000·Sr)    | Na/(1000·Sr) | Ca/(1000·Sr)  | Na/(1000·Sr) |
| 0.0      | 0.305           | 0.452        | 0.375         | 0.384        |
| 5.5      | 0.309           | 0.424        | 0.367         | 0.709        |
| 8.5      | 0.315           | 0.450        | 0.300         | 1.251        |
| 11.5     | 0.306           | 0.849        | 0.319         | 1.958        |
| 14.5     | 0.265           | 1.321        | 0.380         | 0.834        |
| 17.5     | 0.286           | 1.381        | 0.361         | 1.044        |
| 20.5     | 0.346           | 0.877        | 0.369         | 0.537        |
| 26.5     | 0.336           | 0.645        | 0.371         | 0.506        |
| 32.5     | 0.334           | 0.629        | 0.373         | 0.464        |
| 35.5     | 0.415           | 0.498        | 0.347         | 3.325        |
| 38.5     | 0.365           | 0.879        | 0.370         | 0.578        |
| 41.5     | 0.358           | 0.788        | 0.376         | 0.734        |
| 44.5     | 0.359           | 0.889        | 0.388         | 0.826        |
| 47.5     | 0.380           | 0.703        | 0.402         | 0.567        |
| 50.5     | 0.377           | 0.768        | 0.394         | 0.457        |
| 53.5     | 0.371           | 0.625        | 0.403         | 0.415        |
| 56.5     | 0.375           | 0.522        | 0.368         | 0.685        |
| 59.5     | 0.354           | 0.516        | 0.396         | 0.467        |
| 62.5     | 0.367           | 0.616        | 0.382         | 0.561        |
| 68.5     | 0.356           | 0.669        | 0.378         | 0.714        |
| 71.5     | 0.353           | 0.647        | 0.387         | 0.512        |



**Table S6** the sediment chemistry of Guting Bridge.

| duration               | Ca                   | Na   | Al    | Fe    | K     | Mg    | Mn  | Ti   | Sr  |
|------------------------|----------------------|------|-------|-------|-------|-------|-----|------|-----|
| hr                     | $\mu\text{g g}^{-1}$ |      |       |       |       |       |     |      |     |
| 5.5                    | 10914                | 9981 | 78214 | 42084 | 23413 | 11294 | 524 | 4901 | 101 |
| 41.5                   | 9833                 | 8919 | 86454 | 48893 | 28034 | 13157 | 552 | 5319 | 99  |
| Total loss, $\tau$ (%) | -17                  | -18  | -17   | 7     | 10    | 7     | 3   | -    | -10 |

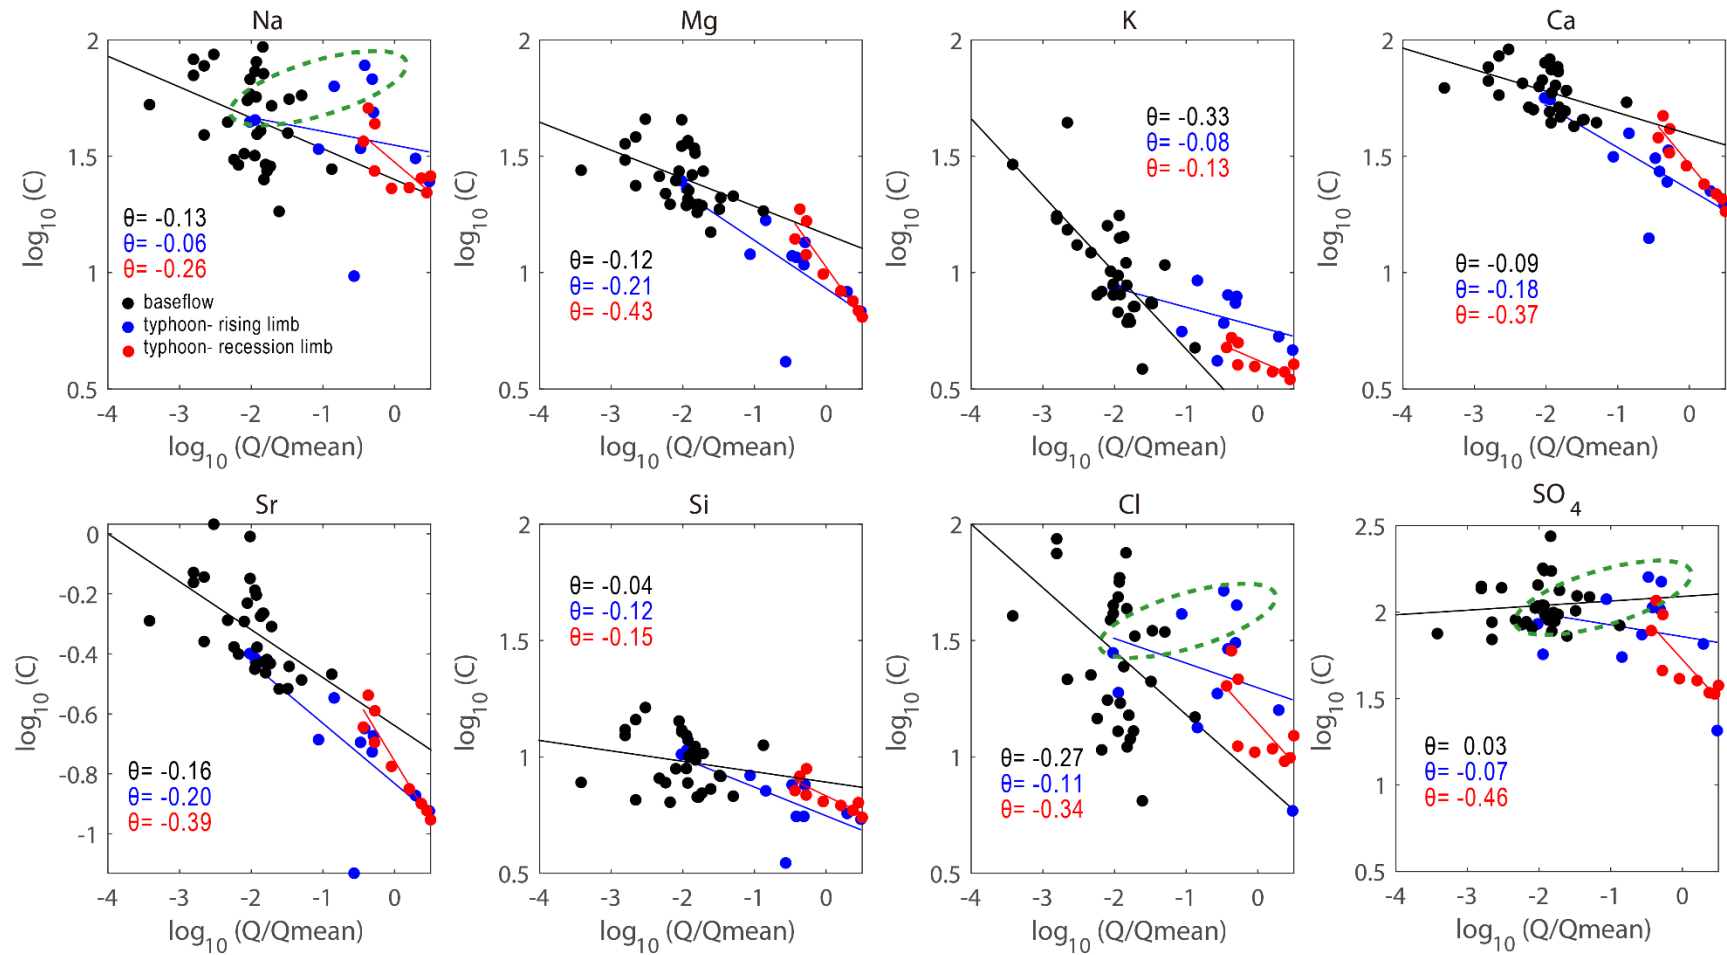

Fig. S2. The cQ relationships at rising and recession limb of the typhoon event, and baseflow at Nanxiong Bridge. Black, blue and red colors denote the sample from baseflow, rising and recession limb, respectively. Green dashed circles denote the sample of Na, Cl, and  $\text{SO}_4$  at the certain period of rising limb. Dots, lines and numbers denote samples, trendline and slope respectively.
